# Supplementary material
Source: PubMed Central journal article supplement (PMC6435344)
Supplement: Supp_Fig1.pdf [file Supp_Fig1.pdf]

## Supplementary Data

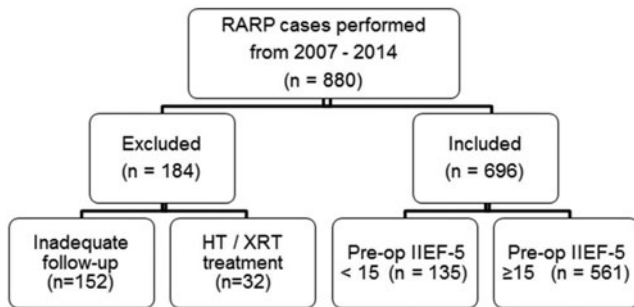

**SUPPLEMENTARY FIG. S1.** Study schema. APA=accessory pudendal artery; HT/XRT=hormonal therapy/radiation therapy; IIEF-5=International Index of Erectile Function-5; RARP=robot-assisted radical prostatectomy.
